# Supplementary material for: Colorimetric determination of hexavalent chromium with ascorbic acid capped silver nanoparticles
Source: Royal Society of Chemistry journal article supplement (doi:10.1039/c2ay25989c), 2012-11-20
Supplement: c2ay25989c.pdf [file c2ay25989c.pdf]

## Colorimetric determination of hexavalent chromium with ascorbic acid capped silver nanoparticles

Xiaoyan Wu, Yunbo Xu, Yangjun Dong, Xue Jiang, Ningning Zhu\*

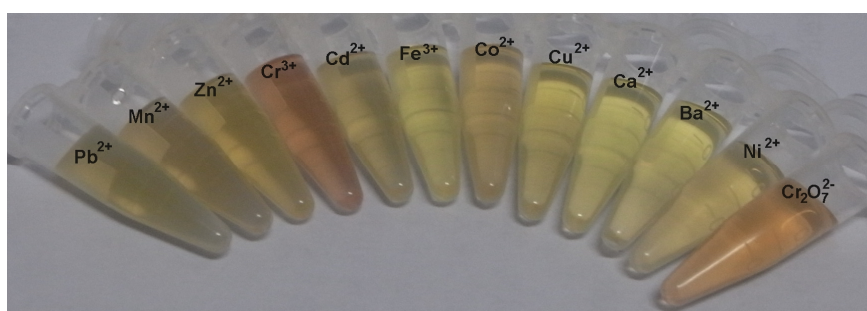

Fig. S1 The corresponding photographic images of the AA-capped AgNPs solution in the presence of 9.57  $\mu\text{M}$  Cr (VI) or other analytes without pretreatment with 0.05 M  $\text{K}_2\text{CO}_3$ , respectively.
